# Supplementary material for: Mortality Prediction Model before Surgery for Acute Mesenteric Infarction: A Population-Based Study
Source: MDPI journal article supplement (doi:10.3390/jcm11195937), 2022-10-08
Supplement: s1 [file s1]

**Table S1.** Translation of Comorbidities into ICD-9-CM Codes.

| <b>Diagnostic Category</b>                                          | <b>ICD-9-CM Codes</b> | <b>Description</b>                                                         |
|---------------------------------------------------------------------|-----------------------|----------------------------------------------------------------------------|
| Myocardial infarction                                               | 410-410.9             | Acute myocardial infarction                                                |
|                                                                     | 412                   | Old myocardial infarction                                                  |
| Congestive heart failure                                            | 428-428.9             | Heart failure                                                              |
| Vascular disease                                                    | 443.9                 | Peripheral vascular disease, including intermittent claudication           |
|                                                                     | 441-441.9             | Aortic aneurysm                                                            |
|                                                                     | 785.4                 | Gangrene                                                                   |
|                                                                     | V43.4                 | Blood vessel replaced by prosthesis                                        |
|                                                                     | Procedure 38.48       | Resection and replacement of lower limb arteries                           |
| Cerebrovascular disease                                             | 430-438               | Cerebrovascular disease                                                    |
| Dementia (From RICPD and DD)                                        | 290-290.9             | Senile and presenile dementias                                             |
| Chronic pulmonary disease                                           | 490-496               | Chronic obstructive pulmonary disease                                      |
|                                                                     | 500-505               | Pneumoconioses                                                             |
|                                                                     | 506.4                 | Chronic respiratory conditions due to fumes and vapors                     |
| Rheumatologic disease (From RICPD and DD)                           | 710.0                 | Systemic lupus erythematosus                                               |
|                                                                     | 710.1                 | Systemic sclerosis                                                         |
|                                                                     | 710.4                 | polymyositis                                                               |
|                                                                     | 714.0-714.2           | Adult rheumatoid arthritis                                                 |
|                                                                     | 714.81                | Rheumatoid lung                                                            |
|                                                                     | 725                   | polymyalgiarheumatica                                                      |
| Peptic ulcer disease                                                | 531-534.9             | Gastric, duodenal and gastrojejunal ulcers                                 |
|                                                                     | 531.4-531.7           | Chronic forms of peptic ulcer disease ( subset of above listing )          |
|                                                                     | 532.4-532.7           |                                                                            |
|                                                                     | 533.4-533.7           |                                                                            |
|                                                                     | 534.4-534.7           |                                                                            |
| Severe liver disease (From RICPD and DD)                            | 572.2-572.8           | Hepatic coma, portal hypertension, other sequelae of chronic liver disease |
|                                                                     | 456.0-456.2           | Esophageal varices                                                         |
| Diabetes                                                            | 250-250.3             | Diabetes with or without acute metabolic disturbances                      |
|                                                                     | 250.7                 | Diabetes with peripheral circulatory disorders                             |
|                                                                     | 250.4-250.6           | Diabetes with renal, ophthalmic, or neurological manifestations            |
| Hemiplegia or paraplegia                                            | 344.1                 | Paraplegia                                                                 |
|                                                                     | 342-342.9             | Hemiplegia                                                                 |
| Dialysis (From RICPD)                                               | 403,404               | Hypertensive chronic kidney disease                                        |
|                                                                     | 585                   | Chronic renal failure                                                      |
| Any malignancy, including leukemia and lymphoma (From RICPD and DD) | 140-172.9             | Malignant neoplasms                                                        |
|                                                                     | 174-195.8             | Malignant neoplasms                                                        |
|                                                                     | 200-208.9             | Leukemia and lymphoma                                                      |
|                                                                     | 196-199.1             | Secondary malignant neoplasm of lymph nodes and other organs               |

Abbreviations: RICPD: Registry of Catastrophic Illness Patient Database; DD: inpatient expenditures by admission.

**Table S2.** Logistic regression analysis of patient parameters potentially associated with 30-day mortality

|                                       | Univariant analysis |        | Multivariable analysis |             |                  |       |       |
|---------------------------------------|---------------------|--------|------------------------|-------------|------------------|-------|-------|
|                                       | OR                  | p      | Adjusted OR            | 95% CI      | p                | B     | Score |
| Age ≥62 years                         | 2.614               | <0.001 | 2.275                  | 1.808–2.863 | <0.001           | 0.822 | 3     |
| Men                                   | 0.992               | 0.920  |                        |             |                  |       |       |
| Myocardial infarction                 | 1.856               | <0.001 | 1.227                  | 0.893–1.686 | 0.206            |       |       |
| Congestive heart failure              | 2.159               | <0.001 | 1.475                  | 1.197–1.818 | <b>&lt;0.001</b> | 0.389 | 1     |
| Perivascular disease                  | 1.188               | 0.046  | 1.077                  | 0.904–1.284 | 0.404            |       |       |
| Cerebral disease                      | 1.780               | <0.001 | 1.275                  | 1.041–1.562 | <b>0.019</b>     | 0.243 | 1     |
| Dementia                              | 1.820               | 0.018  | 1.349                  | 0.803–2.266 | 0.259            |       |       |
| Chronic obstructive pulmonary disease | 1.609               | <0.001 | 1.045                  | 0.839–1.300 | 0.696            |       |       |
| Rheumatic disease                     | 1.624               | 0.097  | 1.687                  | 0.930–3.061 | 0.085            |       |       |
| Peptic ulcer disease                  | 2.000               | <0.001 | 1.513                  | 1.259–1.819 | <b>&lt;0.001</b> | 0.414 | 1     |
| Severe liver disease                  | 2.815               | <0.001 | 3.140                  | 1.988–4.960 | <b>&lt;0.001</b> | 1.144 | 4     |
| Hemiplegia                            | 1.524               | 0.030  | 1.052                  | 0.697–1.589 | 0.809            |       |       |
| Hemodialysis                          | 2.208               | <0.001 | 1.736                  | 1.330–2.264 | <b>&lt;0.001</b> | 0.551 | 2     |
| Hypertension                          | 1.755               | <0.001 | 0.960                  | 0.782–1.179 | 0.699            |       |       |
| Hyperlipidemia                        | 1.249               | 0.090  | 0.777                  | 0.587–1.028 | 0.078            |       |       |
| Gout                                  | 1.794               | <0.001 | 1.231                  | 0.932–1.626 | 0.143            |       |       |
| Malignancy                            | 1.236               | 0.046  | 1.184                  | 0.954–1.471 | 0.125            |       |       |
| Obese                                 | 0.000               | 0.999  |                        |             |                  |       |       |
| Diabetes                              | 1.785               | <0.001 | 1.307                  | 1.080–1.580 | <b>0.006</b>     | 0.267 | 1     |
| Heart conduct disease                 | 1.651               | <0.001 | 1.152                  | 0.933–1.422 | 0.188            |       |       |
| Laparoscope operation                 | 0.409               | 0.796  |                        |             |                  |       |       |

OR, odds ratio; CI, confidence interval.

**Table S3.** The different scoring systems.

| Factors                  | B                     | Multiplied Number |        |        |        |        |        |        |        |        |
|--------------------------|-----------------------|-------------------|--------|--------|--------|--------|--------|--------|--------|--------|
|                          |                       | 1                 | 1.3    | 1.5    | 1.9    | 2.1    | 2.2    | 2.8    | 3.1    | 3.7    |
| Age > 62 y/o             | 0.822                 | 1                 | 1      | 1      | 2      | 2      | 2      | 2      | 3      | 3      |
| Congestive heart failure | 0.389                 | 0                 | 1      | 1      | 1      | 1      | 1      | 1      | 1      | 1      |
| Cerebral disease         | 0.243                 | 0                 | 0      | 0      | 0      | 1      | 1      | 1      | 1      | 1      |
| Peptic ulcer disease     | 0.414                 | 0                 | 1      | 1      | 1      | 1      | 1      | 1      | 1      | 2      |
| Severe liver disease     | 1.144                 | 1                 | 1      | 2      | 2      | 2      | 3      | 3      | 4      | 4      |
| Hemodialysis             | 0.551                 | 1                 | 1      | 1      | 1      | 1      | 1      | 2      | 2      | 2      |
| Diabetes                 | 0.267                 | 0                 | 0      | 0      | 1      | 1      | 1      | 1      | 1      | 1      |
| Derivation cohort Result | #AUC of ROC           | 0.623             | 0.661  | 0.664  | 0.669  | 0.672  | 0.673  | 0.676  | 0.677  | 0.675  |
|                          | *Calibration $\chi^2$ | 8.207             | 22.335 | 21.844 | 26.426 | 28.719 | 26.472 | 26.718 | 19.887 | 23.110 |
|                          | Calibration p         | 0.004             | <0.001 | <0.001 | <0.001 | <0.001 | <0.001 | <0.001 | 0.001  | <0.001 |

\* Calibration was done with Hosmer–Lemeshow goodness-of-fit test # all  $p < 0.05$ .

**Table S4.** Distribution of patients according to the acute mesenteric ischemia mortality score.

| Score | Derivation cohort |           |                | Validation Cohort |           |                | Total Cohort |           |                |
|-------|-------------------|-----------|----------------|-------------------|-----------|----------------|--------------|-----------|----------------|
|       | Total             | 30-Days   | Mortality rate | Total             | 30-Days   | Mortality rate | Total        | 30-Days   | Mortality rate |
|       | number            | Mortality |                | number            | Mortality |                | number       | Mortality |                |
|       | r                 | y         |                |                   | y         |                | r            | y         |                |
| 0     | 791               | 35        | 4.4%           | 201               | 7         | 3.5%           | 992          | 42        | 4.2%           |
| 1     | 207               | 27        | 13.0%          | 62                | 3         | 4.8%           | 269          | 30        | 11.2%          |
| 2     | 77                | 8         | 10.4%          | 19                | 3         | 15.8%          | 96           | 11        | 11.5%          |
| 3     | 943               | 129       | 13.7%          | 236               | 35        | 14.8%          | 1179         | 164       | 13.9%          |
| 4     | 859               | 183       | 21.3%          | 195               | 40        | 20.5%          | 1054         | 223       | 21.2%          |
| 5     | 530               | 143       | 27.0%          | 125               | 34        | 27.2%          | 655          | 177       | 27.0%          |
| 6     | 265               | 79        | 29.8%          | 73                | 23        | 31.5%          | 338          | 102       | 30.2%          |
| 7     | 132               | 47        | 35.6%          | 36                | 14        | 38.9%          | 168          | 61        | 36.3%          |
| 8     | 77                | 19        | 24.7%          | 16                | 7         | 43.8%          | 93           | 26        | 28.0%          |
| 9     | 27                | 10        | 37.0%          | 11                | 1         | 9.1%           | 38           | 11        | 28.9%          |
| 10    | 5                 | 3         | 60.0%          | 3                 | 0         | 0.0%           | 8            | 3         | 37.5%          |
| 11    | 5                 | 1         | 20.0%          | 1                 | 1         | 100.0%         | 6            | 2         | 33.3%          |
| 12    | 0                 | 0         | N.A.           | 0                 | 0         | N.A.           | 0            | 0         | N.A.           |
| 13    | 0                 | 0         | N.A.           | 1                 | 0         | 0.0%           | 1            | 0         | 0.0%           |

Scores: 0, very low risk; 1–3, low risk; 4–6, intermediate risk; 7–13, high risk.

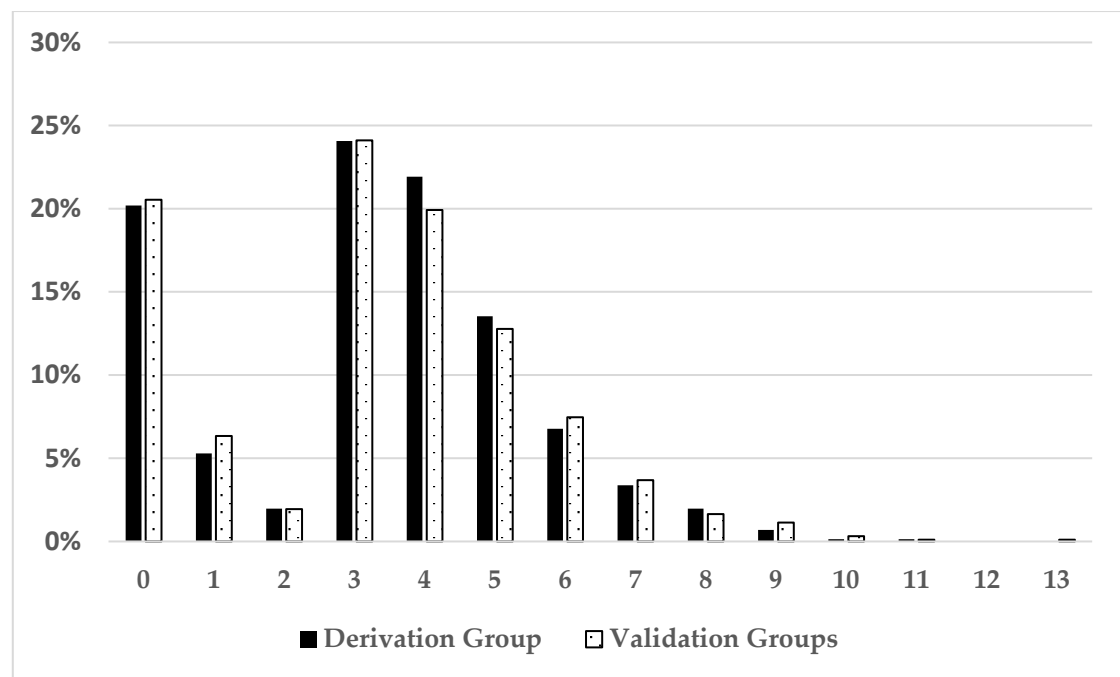

Figure S1: Distribution of Score in two groups
